# Supplementary material for: Adjuvant therapy in renal cell carcinoma: is it the right strategy to inhibit VEGF?
Source: PubMed Central journal article supplement — Transl Androl Urol. 2021 Mar;10(3):1581–7. doi: 10.21037/tau-20-1125 (PMC8039625; doi:10.21037/tau-20-1125), 2021-03
Supplement: tau-10-03-1581-supplementary.pdf [file tau-10-03-1581-supplementary.pdf]

Supplementary

**Table 1** Characteristics of the clinical trials included in the meta-analysis. References of included studies refer to the Bibliography of the manuscript. Abbreviations: cc = clear cell; ncc = non clear cell; DFS = disease free survival; OS = overall survival; UISS = University of California Los Angeles Integrated Staging System; SSIGN = stage, size, grade and necrosis score; Exp. = experimental.

| Study                            | Stage                                                                                | cc (n%)/ ncc (n%) |     | Risk staging system    | Treatment Experimental/control                                                                                                                                                                                                                                                                                                | Duration of treatment | Dose reduction                                                                                                                                               |                                                                                                                               | Patients n treatment group / n tot        | Median DFS (yr)                 | Median OS (yr) | Most common adverse events (≥ grade 3)                                               |                                                                   |
|----------------------------------|--------------------------------------------------------------------------------------|-------------------|-----|------------------------|-------------------------------------------------------------------------------------------------------------------------------------------------------------------------------------------------------------------------------------------------------------------------------------------------------------------------------|-----------------------|--------------------------------------------------------------------------------------------------------------------------------------------------------------|-------------------------------------------------------------------------------------------------------------------------------|-------------------------------------------|---------------------------------|----------------|--------------------------------------------------------------------------------------|-------------------------------------------------------------------|
| <b>ASSURE (Haas) (16)</b>        | pT1b G3-4 N0 (or pNx where clinically N0) M0, to any T any G N + (fully resected) M0 | 79%               | 21% | UISS                   | <ul style="list-style-type: none"> <li>Sunitinib 50 mg once daily, 4-weeks on/2-weeks off</li> <li>Sorafenib 400 mg twice-daily</li> </ul> <p>Starting doses amended for the first one or two cycles</p> <ul style="list-style-type: none"> <li>Sunitinib: 37,5 mg once daily</li> <li>Sorafenib 400 mg once daily</li> </ul> | 54 weeks              | <p>Started at reduced doses:</p> <ul style="list-style-type: none"> <li>Sunitinib/placebo: 380/1294 patients</li> <li>Sorafenib/placebo: 378/1296</li> </ul> | Exp. Sunitinib                                                                                                                | 647/1943                                  | 5.8                             | Not reached    | Hypertension (17%)<br>Hand-foot syndrome (15%)<br>Rash (2%)                          |                                                                   |
|                                  |                                                                                      |                   |     |                        |                                                                                                                                                                                                                                                                                                                               |                       |                                                                                                                                                              | Exp. Sorafenib                                                                                                                | 649/1943                                  | 6.1                             | Not reached    | Hypertension (16%)<br>Hand-foot syndrome (33%)<br>Rash (15%)                         |                                                                   |
|                                  |                                                                                      |                   |     |                        |                                                                                                                                                                                                                                                                                                                               |                       |                                                                                                                                                              | Control                                                                                                                       | 647/1943                                  | 6.6                             | Not reached    | Hypertension (4%)<br>Hand-foot syndrome (1%)<br>Rash (1%)                            |                                                                   |
| <b>S-TRAC (Ravaud) (12)</b>      | T3 or T4 and N0 or Nx M0, or any T and N+ M0                                         | 100%              | 0%  | UISS                   | Sunitinib 50 mg once daily, 4-weeks on/2-weeks off                                                                                                                                                                                                                                                                            | 1 year                | Dose reduction to 37.5 mg once daily in the sunitinib group: 34.3%                                                                                           | Exp.                                                                                                                          | 309/615                                   | 6.8                             | Not reached    | Palmar-plantar erythrodysesthesia (16%)<br>Hypertension (7.8%)<br>Neutropenia (7.5%) |                                                                   |
|                                  |                                                                                      |                   |     |                        |                                                                                                                                                                                                                                                                                                                               |                       |                                                                                                                                                              | Control                                                                                                                       | 306/615                                   | 5.6                             | Not reached    | Palmar-plantar erythrodysesthesia (0.3%)<br>Hypertension (1.3%)                      |                                                                   |
| <b>PROTECT (Motzer) (14)</b>     | pT2 G3-4 N0                                                                          | 100%              | 0%  | SSIGN                  | Pazopanib 800 mg once daily                                                                                                                                                                                                                                                                                                   | 1 year                | Dose reduction in pazopanib 800 mg: 60%                                                                                                                      | Exp.                                                                                                                          | 800 mg: 198/1538                          | ITT <sub>ALL</sub> not reported | Not reported   | Hypertension (25%)<br>Increased ALT (16%)<br>Diarrhea (7%)                           |                                                                   |
|                                  | M0, pT3-T4 any G N0 M0, or any pT any G N1 M0                                        |                   |     |                        | Starting dose amended to 600 mg once daily                                                                                                                                                                                                                                                                                    |                       | Dose reduction in pazopanib 600 mg: 51%                                                                                                                      | 600 mg: 571/1538                                                                                                              | ITT <sub>ALL</sub> (800+600 mg): 769/1538 |                                 |                |                                                                                      |                                                                   |
| <b>ATLAS (Gross-Goupil) (17)</b> | ≥pT2 and/or N+ M0, any Fuhrman grade, ECOG PS 0/1                                    | 100%              | 0%  | TNM and Fuhrman grade  | Axitinib 5 mg twice-daily                                                                                                                                                                                                                                                                                                     | Placebo               | 3 years                                                                                                                                                      | Dose reduction in the axitinib group: 56%                                                                                     | Exp.                                      | 363/724                         | Not reported   | Not mature                                                                           | Treatment-related grade 3-4 adverse events (49%)                  |
|                                  |                                                                                      |                   |     |                        |                                                                                                                                                                                                                                                                                                                               |                       |                                                                                                                                                              |                                                                                                                               | Control                                   | 361/724                         | Not reported   | Not mature                                                                           | Treatment-related grade 3-4 adverse events (12%)                  |
| <b>SORCE (Eisen) (18)</b>        | Leibovich score (3-11)                                                               | 84%               | 16% | Leibovich score (3-11) | Sorafenib 1 year or sorafenib 3 year (400 mg daily starting dose, 400 mg bd maximum dose)                                                                                                                                                                                                                                     | Placebo               | 1 or 3 years                                                                                                                                                 | 400 mg daily starting dose. Increase of dose up to 800 mg in patients without or with low toxicity. 200 mg daily minimum dose | Exp 1 Y                                   | 642/1711                        | 5 Y DFS 67%    | 10 Y OS 69%                                                                          | Hypertension (26%)<br>Hand-foot skin reaction (24%)<br>Rash (7%)  |
|                                  |                                                                                      |                   |     |                        |                                                                                                                                                                                                                                                                                                                               |                       |                                                                                                                                                              |                                                                                                                               | Control                                   | 430/1711                        | 5 Y DFS 67%    | 10 Y OS 70%                                                                          | Hypertension (20%)                                                |
|                                  |                                                                                      |                   |     |                        |                                                                                                                                                                                                                                                                                                                               |                       |                                                                                                                                                              |                                                                                                                               | Exp 3 y                                   | 639/1711                        | 5 Y DFS 65%    | 10 Y OS 69%                                                                          | Hypertension (24%)<br>Hand-foot skin reaction (24%)<br>Rash (10%) |
|                                  |                                                                                      |                   |     |                        |                                                                                                                                                                                                                                                                                                                               |                       |                                                                                                                                                              |                                                                                                                               | Control                                   | 430/1711                        | 5 Y DFS 67%    | 10 Y OS 70%                                                                          | Hypertension (20%)                                                |

## **METHODS**

### **Search strategies**

All phase III clinical trials published until 1 October 2019, evaluating clinical role of tyrosine kinase inhibitors in RCC were retrieved by three different authors (VDN, VM and FM). Keywords used for searching on Pubmed/Medline, Cochrane library, and Scopus, were: 'Adjuvant' OR 'post operative' OR 'peri operative' AND 'sunitinib' OR 'pazopanib' OR 'sorafenib' OR 'pazopanib' OR 'axitinib' OR 'everolimus' OR 'temsirolimus' OR 'cabozantinib' OR 'lenvatinib' OR 'tivozanib' OR 'TKI' OR 'tyrosine kinase inhibitors' AND 'Renal Cell Carcinoma' OR 'RCC' OR 'renal tumours' OR 'renal carcinoma'; only papers published in peer-reviewed journals, and written in English language, were considered. Furthermore, proceedings of the main International Oncological and Urological meetings (American Society of Clinical Oncology, European Society of Medical Oncology, American Association for Cancer Research, European Association of Urology, and American Urological Association), were also searched from 2005 onwards for relevant abstracts. When more than one report was available describing results of the same trial, the most recent information (corresponding to a longer follow-up and/or a higher number of patients) was considered in the analysis. Studies selected from first analysis were then restricted to clinical trials and then reviewed by three authors (VDN, VM and FM) separately in three different times.

### **Aims of the meta-analysis**

Aims of the meta-analysis were:

- (i) To evaluate the correlation between adjuvant tyrosine kinase inhibitors and Overall Survival (OS) in all patients. For this aim, phase III randomized clinical trials evaluating TKIs impact on OS were eligible.
- (ii) To evaluate the correlation between adjuvant tyrosine kinase inhibitors and Disease Free Survival (DFS) in all patients. For this aim, phase III randomized clinical trials evaluating TKIs impact on DFS were eligible.

### **Data extraction and synthesis**

The following data were extracted for each publication: (a) study; (b) stage; (c) percentages of patients with clear cell or non clear cells tumours; (d) risk staging system adopted; (e) experimental treatment and comparator arm; (f) dosage of experimental drugs; (g) percentage of patients who experienced dose reduction; (h) number of patients; (i) OS and DFS outcome expressed as HR for patients treated with tyrosine kinase inhibitors compared to placebo comparator arm.

In addition we collected all risk staging system adopted specifying which were the categories of risk considered and the percentage of patients in each risk categories.

Three separate Authors (VDN, VM and FM) conducted the search and identification independently in three different times.

### **Statistical design**

Co-primary endpoints of the meta-analysis were OS and DFS in all patients.

Meta-analysis was performed using the Review Manager (RevMan 5.3) software. Summary measure was HR with 95% CI for OS and DFS. HRs selected for analysis were adjusted for the maximum number of covariates. We applied the inverse variance technique for the meta-analysis of the HRs.. Statistical heterogeneity between studies was examined using the  $\chi^2$  test and the  $I^2$  statistic.
